# Supplementary material
Source: ML conference proceedings conference paper supplement (https://openreview.net/forum?id=z9CkpUorPI)
Supplement: supplementary_material [file attachment]

## 457 A Supplementary Materials

### 458 A.1 Traditional List Scheduling Algorithm

---

**Algorithm 2** Traditional list scheduling algorithm.

---

**Input:** Priority function  $\mathcal{F}$ , CDFG  $G = (V, E)$ , functional unit set  $U$ , and delay array  $d$

**Output:** Generated schedule  $S'$

```

1:  $V_F \leftarrow \phi, V_R \leftarrow \phi, V_U \leftarrow V, S' \leftarrow \phi, Time \leftarrow 0$ 
2: for  $v_i$  in  $V$  do
3:   if  $v_i.inDegree() = 0$  then
4:      $V_R \leftarrow V_R \cup v_i, V_U \leftarrow V_U \setminus v_i$ 
5:   while  $|V_F| < |V|$  do
6:     for  $u_j$  in  $U$  do
7:        $M \leftarrow MAX\_FLOAT, v_{chosen} \leftarrow \phi$ 
8:       for  $v_i$  in  $V_R$  do
9:         if  $\mathcal{F}(v_i) < M$  and  $v_i.canUse(u_j)$  then
10:           $M \leftarrow \mathcal{F}(v_i), v_{chosen} \leftarrow v_i$ 
11:       if  $v_{chosen} = \phi$  or  $u_j.unavailable(Time)$  then
12:         continue
13:        $S'.insert(v_{chosen}, u_j, Time)$ 
14:        $u_j.setUnavailable(Time, Time + d_{u_j} - 1)$ 
15:        $V_R \leftarrow V_R \setminus v_{chosen}, V_F \leftarrow V_F \cup v_{chosen}$ 
16:       for  $v_i$  in  $V_R$  do
17:         if  $(v_{chosen}, v_i) \in E$  then
18:            $E \leftarrow E \setminus (v_{chosen}, v_i)$ 
19:           if  $v_i \in V_U$  and  $v_i.inDegree() = 0$  then
20:              $V_R \leftarrow V_R \cup v_i, V_U \leftarrow V_U \setminus v_i$ 
21:        $Time \leftarrow Time + 1$ 

```

---

459 Algorithm 2 gives an overview of the traditional list scheduling algorithm. Our proposed NeuroSched-  
460 ule method as shown in Algorithm 1 derives from Algorithm 2, while taking our trained neural  
461 network as the priority function. The loop (line 5) runs until each node in the CDFG is successfully  
462 scheduled. In each cycle, for every available functional unit (line 6), the algorithm schedules the  
463 operation  $v_{chosen}$  with the highest priority to the functional unit (line 13). Note that only operations  
464 of the corresponding type of the current functional unit can be chosen (line 9). After the chosen  
465 operation  $v_{chosen}$  is scheduled, all the out edges  $(v_{chosen}, v_i)$  of  $v_{chosen}$  are deleted (line 18). If the  
466 in-degree of  $v_i$  equals 0,  $v_i$  is added into the ready set  $V_R$  (line 20). Finally, the scheduling solution  
467 is obtained in  $S'$ .

468 In the traditional list scheduling algorithm, the most widely-used priority function is:

$$\mathcal{F}_t(i) = ALAP(v_i) - ASAP(v_i) \quad (6)$$

469 where  $ASAP$  and  $ALAP$  are defined as in Section 3. The priority function  $\mathcal{F}_t$  describes the flexibility  
470 of each node in the CDFG. This priority function follows a simple but effective rule: nodes with higher  
471 flexibility are scheduled prior to nodes with lower flexibility. Recently, the force-directed priority  
472 function [12] and the entropy-directed priority function [13] are designed for better scheduling  
473 solutions. In the proposed NeuroSchedule method, our GNN-based priority function shows its  
474 superiority to other methods.

### 475 A.2 Dataset Preparation

476 It is necessary to acquire sufficient data for training a GNN model to predict the operations' priorities.  
477 We propose a CDFG generation algorithm, which generates CDFGs with a balanced structure and  
478 high diversity. Algorithm 3 presents the CDFG generation algorithm, where  $T$  denotes the number  
479 of operations in the generated CDFG,  $M$  denotes the minimum number of operations in a layer,  $N$   
480 denotes the maximum number of operations in a layer,  $I$  denotes the rate that inter-layer operations  
481 are connected,  $U$  denotes the rate that an operation is not connected to a predecessor, and  $G = (V, E)$   
482 denotes the generated CDFG. As shown in the algorithm, operations in the generated CDFG are

483 arranged into several layers, and operations in the current layer are randomly connected to operations  
 484 in previous layers.

---

**Algorithm 3** CDFG generation algorithm.

---

**Input:**  $T, M, N, I, U$   
**Output:** Generated CDFG  $G = (V, E)$

```

1:  $L_1 \leftarrow \phi, L_2 \leftarrow \phi, L_3 \leftarrow \phi, V \leftarrow \phi, E \leftarrow \phi$ 
2: while  $T > 0$  do
3:    $C \leftarrow \text{random.randint}(M, N)$ 
4:    $T \leftarrow T - C$ 
5:   repeat
6:      $C \leftarrow C - 1$ 
7:      $O \leftarrow \text{newOperation}()$ 
8:      $O.\text{optype} \leftarrow \text{randomOpType}()$ 
9:      $V \leftarrow V \cup O$ 
10:     $L_3 \leftarrow L_3 \cup O$ 
11:    if  $\text{random.random}() > U$  then
12:      if  $\text{random.random}() < I$  then
13:         $O' \leftarrow \text{selectRandomElement}(L_1)$ 
14:      else
15:         $O' \leftarrow \text{selectRandomElement}(L_2)$ 
16:       $E \leftarrow E \cup (O, O')$ 
17:    until  $C < 0$ 
18:     $L_1 \leftarrow L_1 \cup L_2$ 
19:     $L_2 \leftarrow L_3$ 
20:     $L_3 \leftarrow \phi$ 
21: return  $(V, E)$ 
```

---

### 485 A.3 Dataset Details

486 Two datasets are synthesized for training and evaluating the proposed model. Details of the synthe-  
 487 sized datasets are presented as follows.

488 First, we synthesize a large dataset including 50000 CDFGs to train our model. The CDFGs are  
 489 randomly generated using the algorithm shown in Algorithm 3, and the labels are generated using  
 490 the ILP methods as introduced in Section 4. The numbers of functional units are randomly generated  
 491 according to the size of CDFG, using the following function:

$$N_{u_i} = \text{randInt}(1, \max(1, \left\lfloor \frac{n_{CDFG}}{10} \right\rfloor)) \quad (7)$$

492 Second, a small dataset including 1000 CDFGs are built to evaluate our training settings in Section 5.2.  
 493 In the small dataset, the number of each functional unit is fixed to 1.

494 For better scalability on real applications, the dataset is extended to give more instructive information  
 495 to our GNN model. The node features for each node  $v_i$  are a 11-dimensional vector  $F$ , and the details  
 496 are given as follows:

- 497 0-1 : Operation's type (one-hot);
- 498 2 : Number of operation's cycles;
- 499 3 : The scheduling result using ASAP method (normalized);
- 500 4 : The scheduling result using ALAP method (normalized);
- 501 5 :  $ASAP(v_i)$  as introduced in Section 3;
- 502 6 :  $ALAP(v_i)$  as introduced in Section 3;
- 503 7 : The scheduling result of traditional list scheduling algorithm using  $ALAP - ASAP$  as
- 504 the priority function;

- 505        8 :  $\max_{v_i \in V} ASAP(v_i)$ ;  
506        9 : The maximum number of cycles obtained by traditional list scheduling algorithm;  
507        10 : The number of corresponding functional units  $u_{v_i}$ .

508 Note that features  $F[3, 4]$  are different from  $F[5, 6]$ , because  $F[3, 4]$  are the scheduling results using  
509 the idea of ASAP and ALAP, while considering the resource constraints. All the node features can be  
510 obtained efficiently by the traditional list scheduling algorithm using  $ALAP - ASAP$  as the priority  
511 function.

#### 512 **A.4 Model details**

513 In our network model, we use a 5-layer GIN [14] to generate the learned operation embeddings. The  
514 dimension of each GIN layer is 64. The learned operation embeddings are fed into a (64, 64) dense  
515 layer, and then into a (64, 1) dense layer. The activation function of each layer in the model is ReLU.  
516 There is a dropout layer between the 5-layer GIN model and the fully connected layers, while the  
517 dropout value is set to be 0.5.

#### 518 **A.5 Experiment Configuration**

519 In our training process, we train our model in 2 stages, pre-training and fine-tuning. More specifically,  
520 we train our GNN model in the following way:

- 521 **Stage 1 : Pre-training:** We use our generated large dataset including 50000 CDFGs to train our  
522 model. The dataset is divided into the training set consisting of 49000 CDFGs, and the  
523 evaluation set consisting of 1000 CDFGs. The learning rate is set to be 0.0002 initially,  
524 which decays by  $lr = 0.9 \times lr$  for each 10 epochs. We train the model for 2500 epochs.
- 525 **Stage 2 : Fine-tuning:** We use our generated small dataset including 1000 CDFGs to fine-tune our  
526 model. The learning rate is set to be 0.0002 initially, which decays by  $lr = 0.9 \times lr$  for  
527 each 10 epochs. We train the model for 25 epochs.
